# Supplementary material for: Development and Evaluation of EDTA-Treated Rabbits for Bioavailability Study of Chelating Drugs Using Levofloxacin, Ciprofloxacin, Hemiacetal Ester Prodrugs, and Tetracycline
Source: MDPI journal article supplement (doi:10.3390/pharmaceutics15061589), 2023-05-24
Supplement: s1 [file s1]

## Additional files

(A)

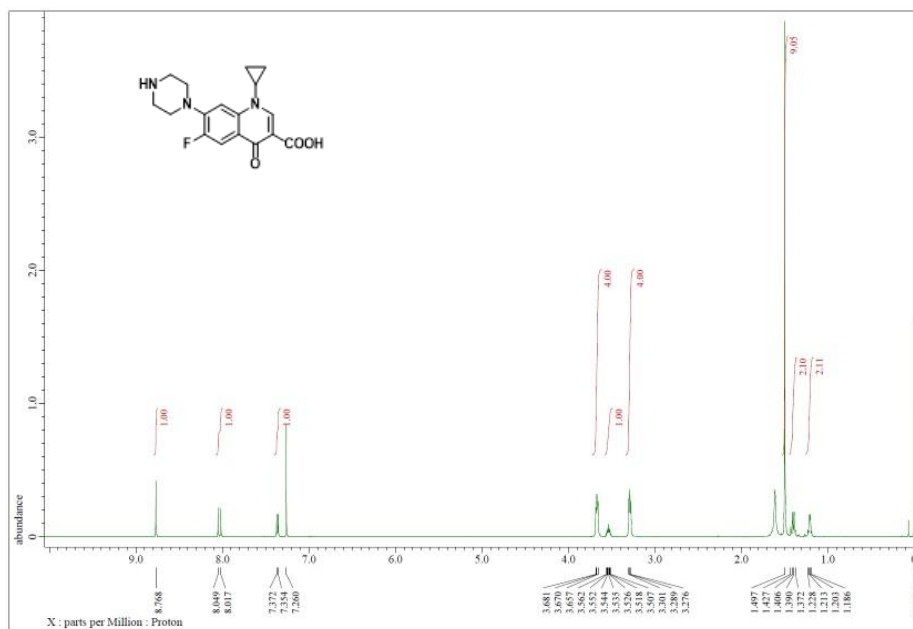

(B)

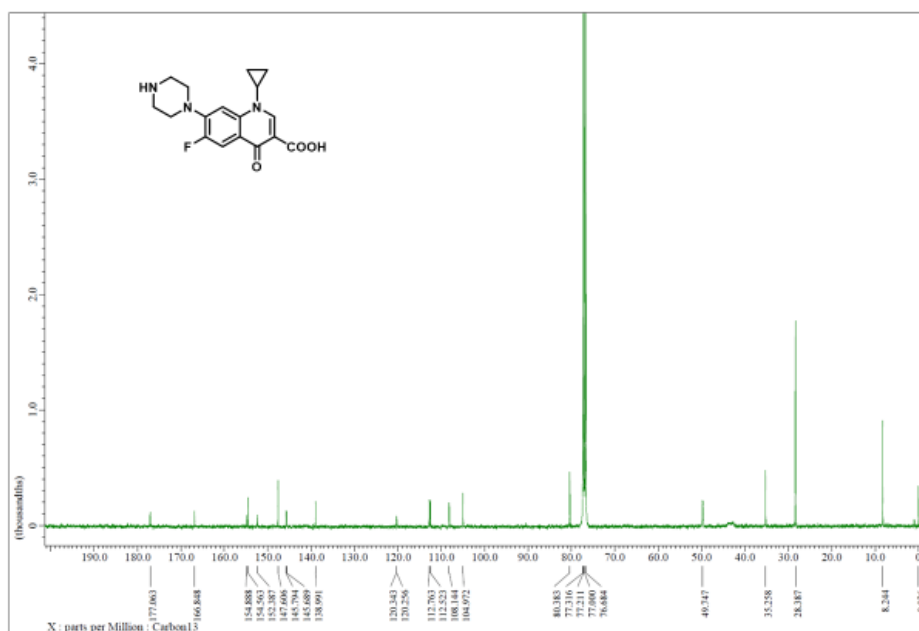

Figure S1. Spectrum of <sup>1</sup>H-NMR (A), and <sup>13</sup>C-NMR (B) of CFX

(A)

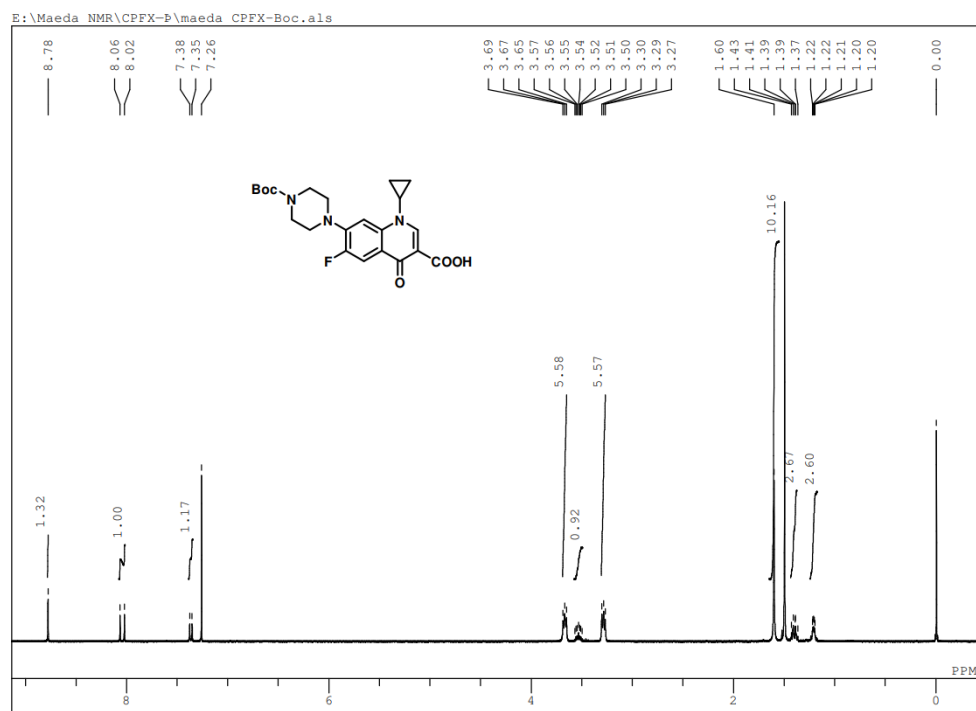

(B)

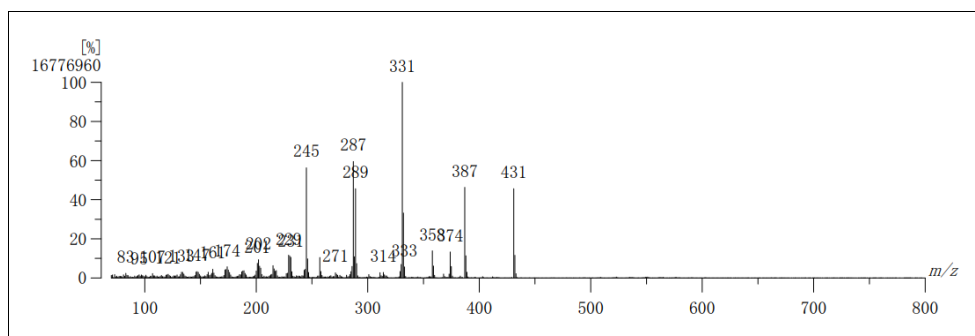

Figure S2. Spectrum of  $^1\text{H}$ -NMR (A), and Mass (B) of Boc-CFX

(A)

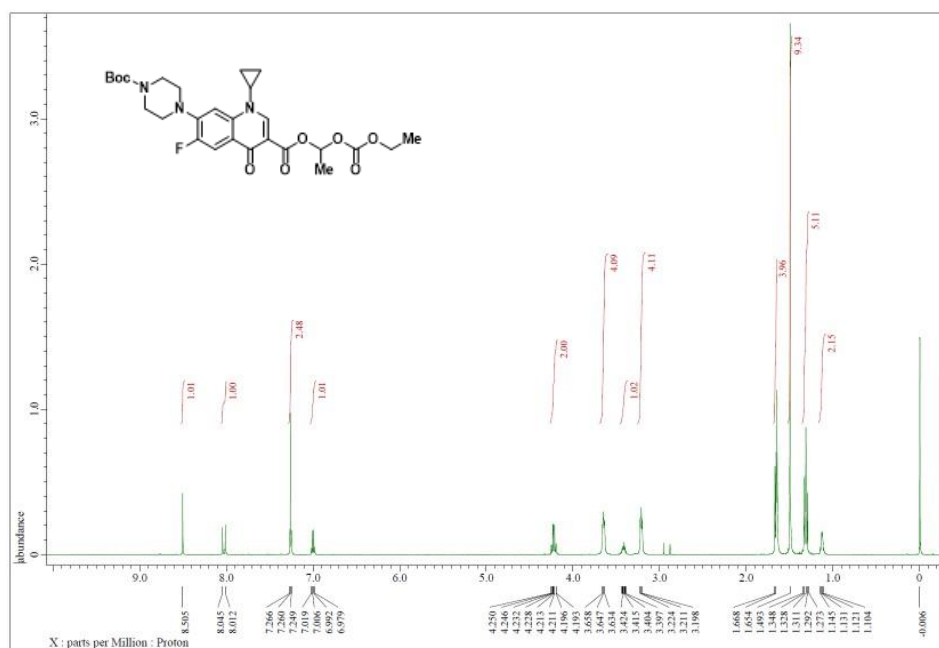

(B)

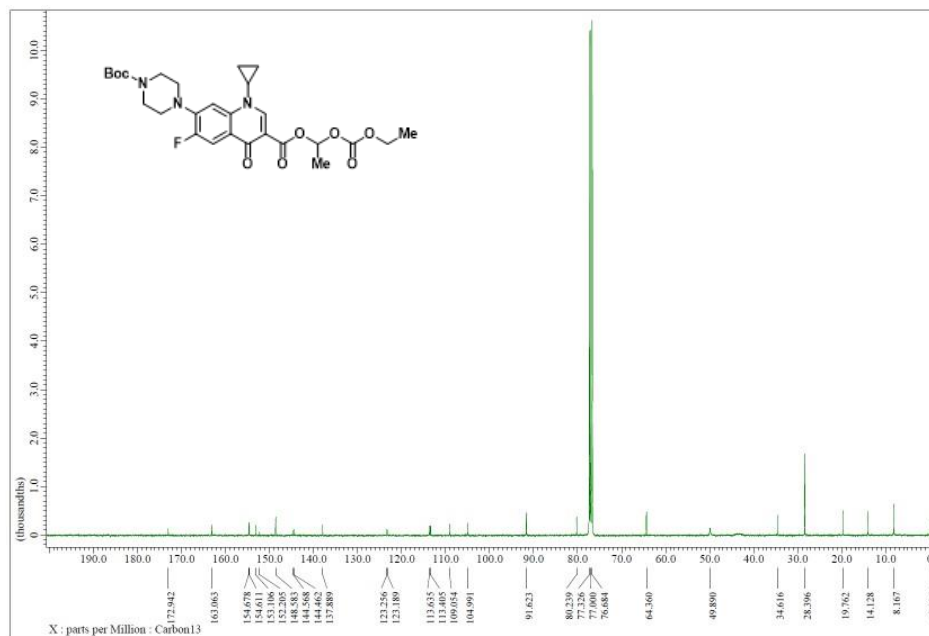

(C)

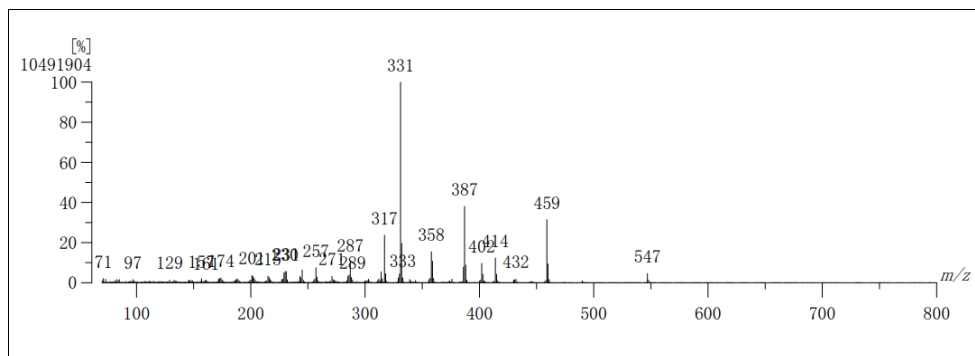

Figure S3. Spectrum of  $^1\text{H}$ -NMR (A),  $^{13}\text{C}$ -NMR (B) and Mass (C) of Boc-CFX-EHE

(A)

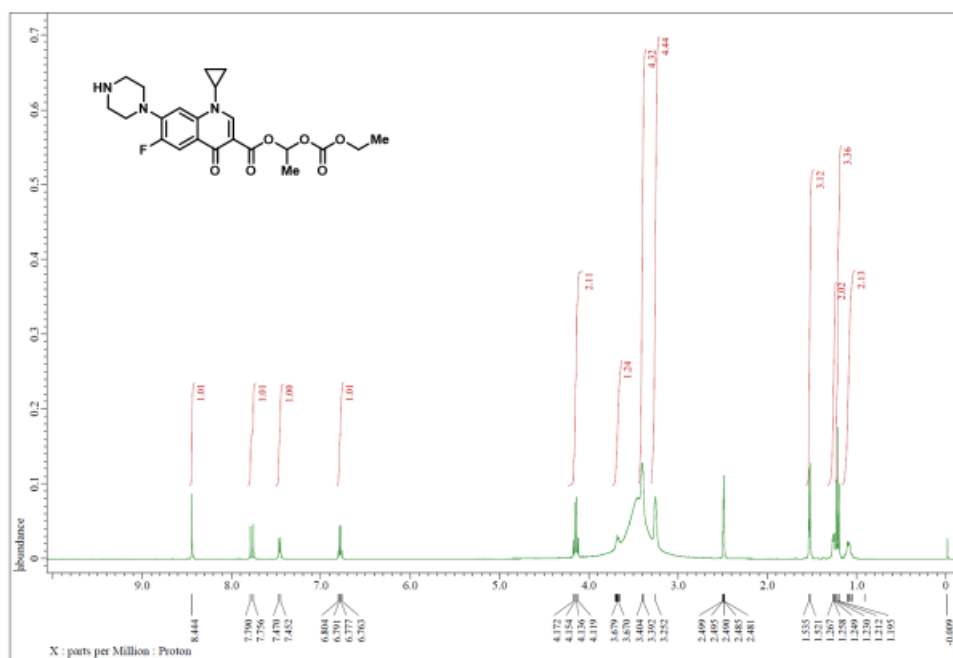

(B)

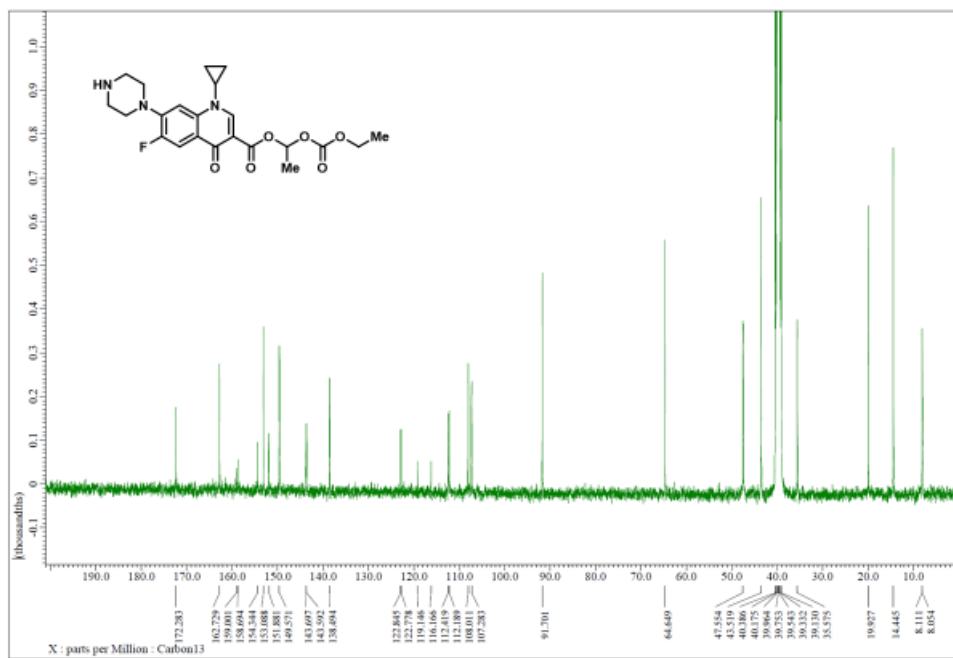

(C)

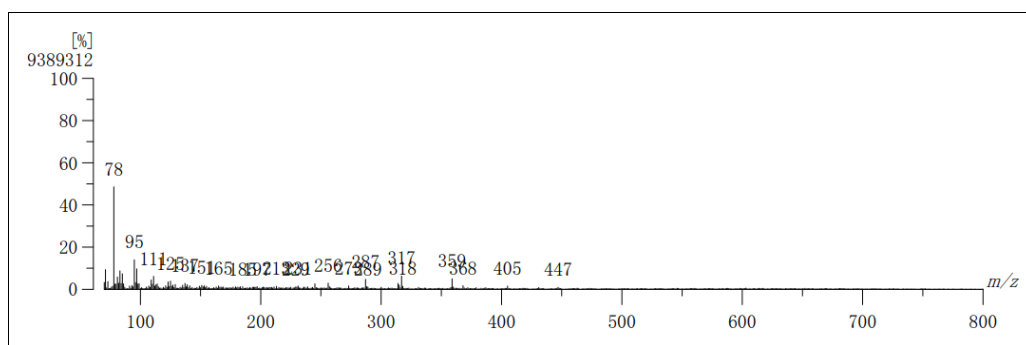

Figure S4. Spectrum of <sup>1</sup>H-NMR (A), <sup>13</sup>C-NMR (B) and Mass (C) of CFX-EHE
